# Supplementary material
Source: Springer Nature journal article supplement (https://www.springermedizin.de/resource/supplementary/12974_2011_392_MOESM4_ESM.pdf/9601542)

Day 6

LNC

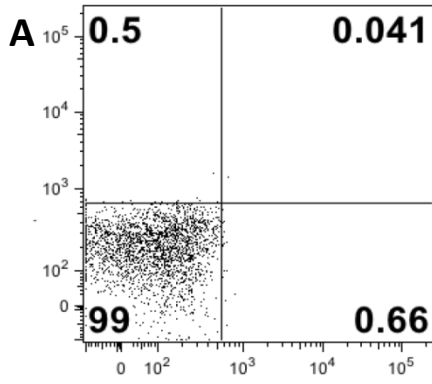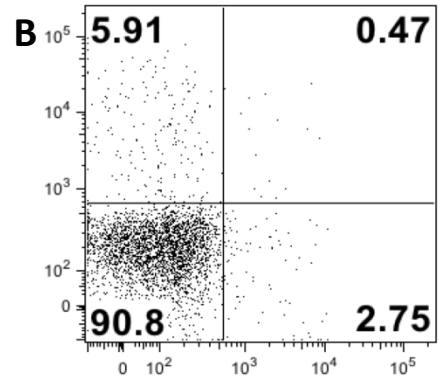

SPC

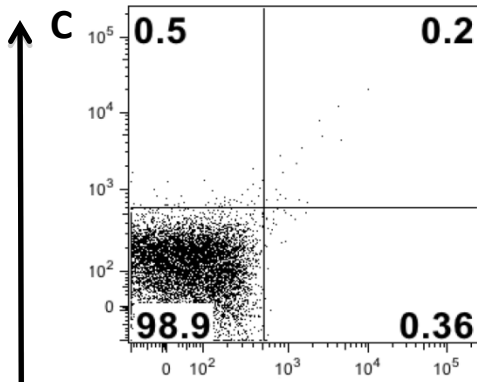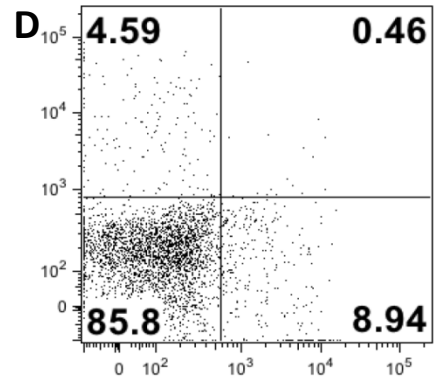

Day 12

LNC

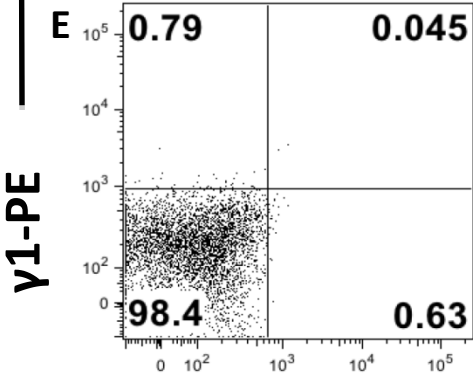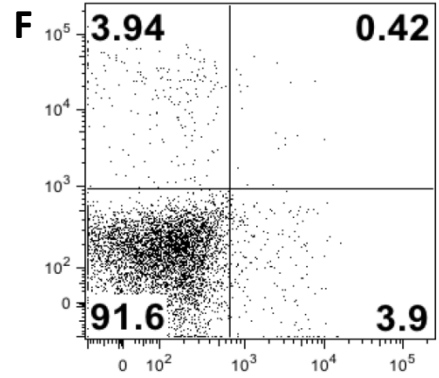

SPC

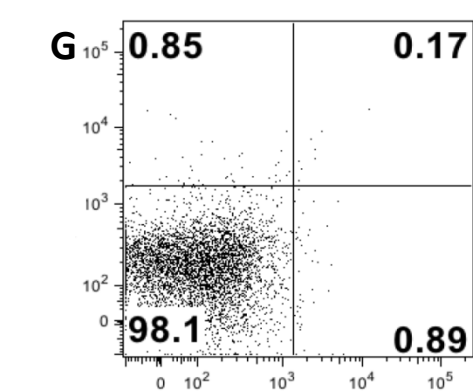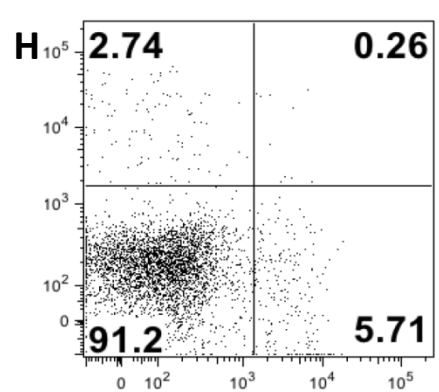

γ1-PE-Cy7

IFN $\gamma$

γ1-PE

IL-17

Supplement: MOESM4 [file 9601542]
